# Supplementary material
Source: PubMed Central journal article supplement (PMC4213237)
Supplement: NIHMS627780-supplement-2.pdf [file NIHMS627780-supplement-2.pdf]

|                       |                                             |                          |           |
|-----------------------|---------------------------------------------|--------------------------|-----------|
| Corresponding Author: | <u>Kathryn V. Anderson and Song-Hai Shi</u> | # Main Figures:          | <u>7</u>  |
| Manuscript Number:    | <u>NN-A48506B</u>                           | # Supplementary Figures: | <u>15</u> |
| Manuscript Type:      | <u>Article</u>                              | # Supplementary Tables:  | <u>0</u>  |
|                       |                                             | # Supplementary Videos:  | <u>0</u>  |

## Reporting Checklist for Nature Neuroscience

This checklist is used to ensure good reporting standards and to improve the reproducibility of published results. For more information, please read [Reporting Life Sciences Research](#).

Please note that in the event of publication, it is mandatory that authors include all relevant methodological and statistical information in the manuscript.

### ► Statistics reporting, by figure

- Please specify the following information for each panel reporting quantitative data, and where each item is reported (section, e.g. Results, & paragraph number).
- Each figure legend should ideally contain an exact sample size (n) for each experimental group/condition, where n is an exact number and not a range, a clear definition of how n is defined (for example x cells from x slices from x animals from x litters, collected over x days), a description of the statistical test used, the results of the tests, any descriptive statistics and clearly defined error bars if applicable.
- For any experiments using custom statistics, please indicate the test used and stats obtained for each experiment.
- Each figure legend should include a statement of how many times the experiment shown was replicated in the lab; the details of sample collection should be sufficiently clear so that the replicability of the experiment is obvious to the reader.
- For experiments reported in the text but not in the figures, please use the paragraph number instead of the figure number.

**Note:** Mean and standard deviation are not appropriate on small samples, and plotting independent data points is usually more informative. When technical replicates are reported, error and significance measures reflect the experimental variability and not the variability of the biological process; it is misleading not to state this clearly.

| FIGURE NUMBER           | TEST USED       |                       | n            |                                    |                       | DESCRIPTIVE STATS (AVERAGE, VARIANCE) |                       | P VALUE     |                       | DEGREES OF FREEDOM & F/t/z/R/ETC VALUE |                       |
|-------------------------|-----------------|-----------------------|--------------|------------------------------------|-----------------------|---------------------------------------|-----------------------|-------------|-----------------------|----------------------------------------|-----------------------|
|                         | WHICH TEST?     | SECTION & PARAGRAPH # | EXACT VALUE  | DEFINED?                           | SECTION & PARAGRAPH # | REPORTED?                             | SECTION & PARAGRAPH # | EXACT VALUE | SECTION & PARAGRAPH # | VALUE                                  | SECTION & PARAGRAPH # |
| example 1a              | one-way ANOVA   | Fig. legend           | 9, 9, 10, 15 | mice from at least 3 litters/group | Methods para 8        | error bars are mean +/- SEM           | Fig. legend           | p = 0.044   | Fig. legend           | F(3, 36) = 2.97                        | Fig. legend           |
| example results, para 6 | unpaired t-test | Results para 6        | 15           | slices from 10 mice                | Results para 6        | error bars are mean +/- SEM           | Results para 6        | p = 0.0006  | Results para 6        | t(28) = 2.808                          | Results para 6        |

|               |             | TEST USED             |                | n                     |                              |             | DESCRIPTIVE STATS (AVERAGE, VARIANCE) |             | P VALUE                                                                                                                  |             | DEGREES OF FREEDOM & F/t/z/R/ETC VALUE                                                                                                    |              |
|---------------|-------------|-----------------------|----------------|-----------------------|------------------------------|-------------|---------------------------------------|-------------|--------------------------------------------------------------------------------------------------------------------------|-------------|-------------------------------------------------------------------------------------------------------------------------------------------|--------------|
| FIGURE NUMBER | WHICH TEST? | SECTION & PARAGRAPH # | EXACT VALUE    | DEFINED?              | SECTION & PARAGRAPH #        | REPORTED?   | SECTION & PARAGRAPH #                 | EXACT VALUE | SECTION & PARAGRAPH #                                                                                                    | VALUE       | SECTION & PARAGRAPH #                                                                                                                     |              |
| +<br>-        | 2b          | unpaired t-test       | Methods para 5 | P1: 4,4,4<br>P14: 3,4 | individual brains            | Fig. legend | Mean +/- S.D.                         | Fig. Legend | (P1) (**)<br>p=0.0004<br>40377<br>(P1)(n.s.)<br>p=0.705762<br>(P14)(n.s.)<br>p=0.615884                                  | Fig. Legend | (P1) (**)<br>t=6.94968 df=6<br>(P1) (n.s.)<br>t=0.396059 df=6<br>(P14) (n.s.)<br>t=0.534523 df=5                                          | not included |
| +<br>-        | 2d          | unpaired t-test       | Methods para 5 | 6                     | slices from different brains | Fig. legend | Mean +/- S.D.                         | Fig. Legend | (Cux1)(**)<br>p=1.924645e-007<br>(Cux1)(n.s.)<br>p=0.2419<br>(CTIP2)(**)<br>p=1.235488e-005<br>(CTIP2)(n.s.)<br>p=0.0513 | Fig Legend  | (Cux1)(**)<br>t=12.54 df=10<br>(Cux1)(n.s.)<br>t=1.244 df=10<br>(CTIP2)(**)<br>t=7.956 df=10<br>(CTIP2)(n.s.)<br>t=2.213 df=10            | not included |
| +<br>-        | 2e          | unpaired t-test       | Methods Para 5 | 6                     | slices from different brains | Fig. Legend | Mean +/- S.D.                         | Fig Legend  | (Cux1)(**)<br>p=0.000146232<br>(Cux1)(n.s.)<br>p=0.117941<br>(CTIP2)(n.s.)<br>p=0.809039<br>(CTIP2)(n.s.)<br>p=0.170407  | Fig. Legend | (Cux1)(**)<br>t=5.92413 df=10<br>(Cux1)(n.s.)<br>t=1.71061 df=10<br>(CTIP2)(n.s.)<br>t=0.809039 df=10<br>(CTIP2)(n.s.)<br>t=1.47721 df=10 | not included |
| +<br>-        | 2h          | unpaired t-test       | Methods Para 5 | 4                     | slices from different brains | Fig. Legend | Mean +/- S.D.                         | Fig. Legend | (Cux1)(n.s.)<br>p=0.3922<br>(CTIP2)(n.s.)<br>p=0.2283                                                                    | Fig Legend  | (Cux1)(n.s.)<br>t=0.9219 df=6<br>(CTIP2)(n.s.)<br>t=1.341 df=6                                                                            | not included |
| +<br>-        | 2i          | unpaired t-test       | Methods Para 5 | 4                     | slices from different brains | Fig. Legend | Mean +/- S.D.                         | Fig. Legend | (Cux1)(n.s.)<br>p=0.614403<br>(CTIP2)(n.s.)<br>p=0.293843                                                                | Fig Legend  | (Cux1)(n.s.)<br>t=0.531135 df=6.0<br>(CTIP2)(n.s.)<br>t=1.15017 df=6                                                                      | not included |

|        |    |                 |                |              |                   |             |               |             |                                                                                                                                                                                                                                                                                            |            |                                                                                                                                                                                                                                                                                                        |              |
|--------|----|-----------------|----------------|--------------|-------------------|-------------|---------------|-------------|--------------------------------------------------------------------------------------------------------------------------------------------------------------------------------------------------------------------------------------------------------------------------------------------|------------|--------------------------------------------------------------------------------------------------------------------------------------------------------------------------------------------------------------------------------------------------------------------------------------------------------|--------------|
| +<br>- | 3b | unpaired t-test | Methods Para 5 | 5,4,5        | brains            | Fig. Legend | Mean +/- S.D. | Fig. Legend | (WT v Sas4) (all **) black: p=2.618105e-005 Red: p=0.000179496 Blue: p=7.942957e-006<br><br>(WT v Sas4p53) black (n.s.): p=0.864435 Red(**): p=6.613482e-008 Blue(**): p=6.279737e-006<br><br>(Sas4 v Sas4p53) black (**): p=3.207663e-006 Red(**): p=1.920966e-006 Blue(n.s.): p=0.195505 | Fig Legend | (WT v Sas4) (all **) black: t=9.69782 df=7 Red: t=7.186861 df=7 Blue: t=11.608 df=7<br><br>(WT v Sas4p53) black (n.s.): t=0.176305 df=8 Red(**): t= 18.8029 df=8 Blue(**): t=10.4108 df=8<br><br>(Sas4 v Sas4p53) black (**): t=13.2827 df=7 Red(**): t=14.3262 df=7 Blue(n.s.): t=13.2827 df=7        | not included |
| +<br>- | 3d | unpaired t-test | Methods Para 5 | 5,4,5        | brains            | Fig. Legend | Mean +/- S.D. | Fig. Legend | (WT v Sas4) black (**): p=0.00435901 Red(n.s.): p=0.371786 Blue(**): p=0.00328886<br><br>(WT v Sas4p53) Black (n.s.): p=0.748185 Red(**): p=6.194247e-008 Blue(**): p=9.599451e-005<br><br>(Sas4 v Sas4p53) Black (**): p=0.00334336 Red(**): p=9.295675e-007 Blue(n.s.): p=0.914717       | Fig Legend | (WT v Sas4) black(**): t=4.1382 df=7 Red(n.s.): t=0.954153 df=7 Blue(**): t=4.3663 df=7<br><br>(WT v Sas4p53) black (n.s.): t=7.16158 df=8 Red(**): t=18.9606 df=8 Blue(**): t=0.332324 df=8<br><br>(Sas4 v Sas4p53) black (**): t= 4.35281 df=7 Red(**): t= 15.9365 df=7 Blue(n.s.): t= 0.111019 df=7 | not included |
| +<br>- | 4c | N/A             | N/A            | 105, 91, 143 | EGFP+;PAX6+ cells | Fig. Legend | none          |             |                                                                                                                                                                                                                                                                                            |            |                                                                                                                                                                                                                                                                                                        |              |
| +<br>- | 5c | unpaired t-test | Methods Para 5 | 5,5          | brains            | Fig. Legend | Mean +/- S.D. | Fig. Legend | (**)black p=2.100471e-005<br>(**)red p=9.825736e-006<br>(n.s.) blue p=0.889374                                                                                                                                                                                                             | Fig Legend | (**)black t=8.84771 df=8<br>(**)red t=9.80566 df=8<br>(n.s.) blue t=0.143592 df=8                                                                                                                                                                                                                      | not included |

|        |            |                 |                |                                                                        |                   |             |                                    |             |                                                                                                                                                                                                                                         |             |                                                                                                                                                                                                                                        |              |
|--------|------------|-----------------|----------------|------------------------------------------------------------------------|-------------------|-------------|------------------------------------|-------------|-----------------------------------------------------------------------------------------------------------------------------------------------------------------------------------------------------------------------------------------|-------------|----------------------------------------------------------------------------------------------------------------------------------------------------------------------------------------------------------------------------------------|--------------|
| +<br>- | 5e         | unpaired t-test | Methods Para 5 | 5,5                                                                    | brains            | Fig. Legend | Mean +/- S.D.                      | Fig. Legend | (**)black<br>p=1.187041e-005<br>(**)red<br>p=3.456918e-007<br>(n.s.) blue<br>p=0.241504                                                                                                                                                 | Fig. Legend | (**)black<br>t=9.55942 df=8<br>(**)red<br>t=15.2115 df=8<br>(n.s.) blue<br>t=1.26491 df=8                                                                                                                                              | not included |
| +<br>- | 6b         | unpaired t-test | Methods Para 5 | 461 from 3, 1366 from 3                                                | cells from brains | Fig. Legend | Mean +/- S.D. of individual brains | Fig. Legend | (VZ Surface) both(**)<br>p=1.027823e-005<br>(Extra-VZ) both(**)<br>p=0.000104358                                                                                                                                                        | Fig. Legend | (VZ Surface) both(**)<br>t=27.5809 df=4<br>(Extra-VZ) both(**)<br>t=15.3769 df=4                                                                                                                                                       | not included |
| +<br>- | 6d         | unpaired t-test | Methods Para 5 | 266 from 3, 690 from 3                                                 | cells from brains | Fig. Legend | Mean +/- S.D. of individual brains | Fig. Legend | VZ Surface (Two Foci)(**)<br>p=3.899935e-007<br>(One Foci)(**)<br>p=4.369434e-006<br>(No Foci)(**)<br>p=7.690669e-005<br>Extra-VZ (Two Foci)(**)<br>p=4.867509e-008<br>(One Foci)(**)<br>p=0.00173961<br>(No Foci)(**)<br>p=0.000109052 | Fig. Legend | VZ Surface (Two Foci)(**)<br>t=62.6021 df=4<br>(One Foci)(**)<br>t=34.1832 df=4<br>(No Foci)(**)<br>t=16.6128 df=4<br>Extra-VZ (Two Foci)(**)<br>t=105.353 df=4<br>(One Foci)(**)<br>t=7.44378 df=4<br>(No Foci)(**)<br>t=15.2063 df=4 | Not included |
| +<br>- | 7b (left)  | unpaired t-test | Methods Para 5 | 1,397 PAX6+ cells from 3<br>2,027 PAX6+ cells from 4                   | cells from brains | Fig. Legend | Mean +/- S.D. of individual brains | Fig. Legend | (n.s.)<br>p=0.3509                                                                                                                                                                                                                      | Fig. Legend | (n.s.)<br>t=1.029 df=5                                                                                                                                                                                                                 | Not included |
| +<br>- | 7b (right) | unpaired t-test | Methods Para 5 | 361 PAX6+;BrdU+;EdU+ cells from 3<br>449 PAX6+;BrdU+;EdU+ cells from 4 | cells from brains | Fig. Legend | Mean +/- S.D. of individual brains | Fig. Legend | (**) both<br>p=0.0003                                                                                                                                                                                                                   | Fig. Legend | (**) both<br>t=9.141 df=5                                                                                                                                                                                                              | Not included |
| +<br>- | s3c        | unpaired t-test | Methods Para 5 | 5,4                                                                    | brains            | Fig. Legend | Mean +/- S.D.                      | Fig. Legend | (n.s.) black<br>p=0.725547<br>(n.s.) red<br>p=0.424817<br>(n.s.) blue<br>p=0.591148                                                                                                                                                     | Fig. Legend | (n.s.) black<br>t=0.36548 df=7<br>(n.s.) red<br>t=0.847357 df=7<br>(n.s.) blue<br>t=0.36548 df=7                                                                                                                                       | Not included |
| +<br>- | s3e        | unpaired t-test | Methods Para 5 | 5,4                                                                    | brains            | Fig. Legend | Mean +/- S.D.                      | Fig. Legend | (n.s.) black<br>p=0.804449<br>(n.s.) red<br>p=0.435839<br>(n.s.) blue<br>p=0.91759                                                                                                                                                      | Fig. Legend | (n.s.) black<br>t=0.257163 df=7<br>(n.s.) red<br>t=0.826394 df=7<br>(n.s.) blue<br>t=0.107263 df=7                                                                                                                                     | Not included |

|        |      |                 |                |                                                                    |                   |              |                                                                                              |             |                                                                                                                           |                 |                                                                                                                   |              |
|--------|------|-----------------|----------------|--------------------------------------------------------------------|-------------------|--------------|----------------------------------------------------------------------------------------------|-------------|---------------------------------------------------------------------------------------------------------------------------|-----------------|-------------------------------------------------------------------------------------------------------------------|--------------|
| +<br>- | s3g  | unpaired t-test | Methods Para 5 | 5,4                                                                | brains            | Fig. Legend  | Mean +/- S.D.                                                                                |             | (n.s.) black p=0.547414<br>(n.s.) red p=0.407084<br>(n.s.) blue p=0.794298                                                | Fig. Legend     | (n.s.) black t=0.632082 df=7<br>(n.s.) red t=0.881917 df=7<br>(n.s.) blue t=0.270879 df=7                         | Not included |
| +<br>- | s5a  | unpaired t-test | Methods Para 5 | 3,150 CUX1+ cells from 5 brains<br>3,062 CUX1+ cells from 5 brains | cells from brains | Fig. Legend  | Mean +/- S.D. of individual brains                                                           | Fig. Legend | (Bin 4) (**)<br>p=0.0055                                                                                                  | Fig. Legend     | t=3.762 df=8                                                                                                      | Not included |
| +<br>- | s5c  | unpaired t-test | Methods Para 5 | 3,3                                                                | brains            | Fig. Legend  | Mean +/- S.D.                                                                                | Fig. Legend | FOXP2 (n.s.) p=0.378438<br>SATB2 (n.s.) p=0.417778                                                                        | Fig. Legend     | FOXP2 t=0.989488 df=4<br>SATB2 t=0.902598 df=4                                                                    | Not included |
| +<br>- | s8b  | N/A             | N/A            | 400 p53+ cells from 3                                              | cells from brains | Fig. Legends | Mean +/- S.D.                                                                                | N/A         | N/A                                                                                                                       | N/A             | N/A                                                                                                               | Not included |
| +<br>- | s8d  | N/A             | N/A            | 391 p53+ cells from 3                                              | cells from brains | Fig. Legends | Mean +/- S.D.                                                                                | N/A         | N/A                                                                                                                       | N/A             | N/A                                                                                                               |              |
| +<br>- | s9b  | N/A             | N/A            | 1,388 PAX6+ cells from 3 brains<br>1,484 PAX6+ cells from 3 brains | cells from brains | Fig. Legends | Mean +/- S.D. of individual brains (S.D.=0 for all bars because 100% PAX6+ cells were SOX2+) | Fig. Legend | n.s.                                                                                                                      | Results section | N/A because all values were 100%                                                                                  | not included |
| +<br>- | s9d  | unpaired t-test | Methods Para 5 | 1,359 PAX6+ cells from 3 brains<br>1,511 PAX6+ cells from 3 brains | cells from brains | Fig. Legends | Mean +/- S.D. of individual brains                                                           | Fig. Legend | WT VZ vs Sas4p53 VZ (n.s.) p=0.09924<br>WT VZ vs Sas4p53 eVZ (n.s.) p=0.0868<br>Sas4p53 VZ vs Sas4p53 eVZ (n.s.) p=0.3325 | Fig. Legend     | WT VZ vs Sas4p53 VZ t=2.13861 df=4<br>WT VZ vs Sas4p53 eVZ t=2.259 df=4<br>Sas4p53 VZ vs Sas4p53 eVZ t=1.101 df=4 | not included |
| +<br>- | s9e  | N/A             | N/A            | 253 PAX6+;BLBP+ cells                                              | cells             | Fig. Legends | none                                                                                         |             | N/A                                                                                                                       | N/A             | N/A                                                                                                               | N/A          |
| +<br>- | s10b | unpaired t-test | Methods Para 5 | 4,4,4                                                              | brains            | Fig. Legends | Mean +/- S.D.                                                                                | Fig. Legend | (**) p=1.026693e-006<br>(n.s.) p=0.5784                                                                                   | Fig. Legend     | (**) t=19.96 df=6<br>(n.s.) t=0.5874 df=6                                                                         | not included |

|        |      |                 |                |       |        |              |               |             |                                                                                                                                                                                                                                                                                                                                                  |             |                                                                                                                                                                                                                                                                                                                                                                         |              |
|--------|------|-----------------|----------------|-------|--------|--------------|---------------|-------------|--------------------------------------------------------------------------------------------------------------------------------------------------------------------------------------------------------------------------------------------------------------------------------------------------------------------------------------------------|-------------|-------------------------------------------------------------------------------------------------------------------------------------------------------------------------------------------------------------------------------------------------------------------------------------------------------------------------------------------------------------------------|--------------|
| +<br>- | s10d | unpaired t-test | Methods Para 5 | 4,3,4 | brains | Fig. Legends | Mean +/- S.D. | Fig. Legend | <p>(WT v Sas4)<br/>Black (**):<br/>p=0.00005319<br/>Red (n.s.):<br/>p=0.1595<br/>Blue (**):<br/>p=0.00003470</p> <p>(WT v Sas4p53)<br/>Black (n.s.):<br/>p=0.8820<br/>Red(**): p=<br/>0.00003104<br/>Blue(**):<br/>p=0.00002205</p> <p>(Sas4 v Sas4p53)<br/>Black (**):<br/>p=0.00005319<br/>Red(**):<br/>p=0.0002<br/>Blue(*):<br/>p=0.0394</p> | Fig. Legend | <p>(WT v Sas4)<br/>Black (**):<br/>t=12.73 df=5<br/>Red (n.s.):<br/>t=1.652 df=5<br/>Blue (**):<br/>t=13.89403 df=5</p> <p>(WT v Sas4p53)<br/>Black (n.s.):<br/>t=0.1548 df=6<br/>Red(**):<br/>t=11.15 df=6<br/>Blue(**):<br/>t=11.83034 df=6</p> <p>(Sas4 v Sas4p53)<br/>Black (**):<br/>t=12.73 df=5<br/>Red(**): t=9.656<br/>df=5<br/>Blue (*): t=2.769<br/>df=5</p> | not included |
| +<br>- | s10e | unpaired t-test | Methods Para 5 | 4,3,4 | brains | Fig. Legends | Mean +/- S.D. | Fig. Legend | <p>(WT v Sas4)<br/>Black (**):<br/>p=0.00005381<br/>Red (n.s.):<br/>p=0.1687<br/>Blue (**):<br/>p=0.00007147</p> <p>(WT v Sas4p53)<br/>Black (n.s.):<br/>p=0.3446<br/>Red(**):<br/>p=0.0008<br/>Blue(**):<br/>p=0.0005</p> <p>(Sas4 v Sas4p53)<br/>Black (**):<br/>p=0.0012<br/>Red(**):<br/>p=0.0020<br/>Blue(**):<br/>p=0.0043</p>             | Fig. Legend | <p>(WT v Sas4)<br/>Black (**):<br/>t=12.70 df=5<br/>Red (n.s.):<br/>t=1.608 df=5<br/>Blue (**):<br/>t=11.98 df=5</p> <p>(WT v Sas4p53)<br/>Black (n.s.):<br/>t=1.026 df=6<br/>Red(**):<br/>t=6.268 df=6<br/>Blue(**):<br/>t=6.700 df=6</p> <p>(Sas4 v Sas4p53)<br/>Black (**):<br/>t=6.582 df=5<br/>Red(**):<br/>t=5.876 df=5<br/>Blue (**):<br/>t=4.944 df=5</p>       | not included |

|        |      |                 |                |                                                                          |                   |              |                                    |             |                                                                                                                                                                                                                                                                                                                             |             |                                                                                                                                                                                                                                                                                                                                              |              |
|--------|------|-----------------|----------------|--------------------------------------------------------------------------|-------------------|--------------|------------------------------------|-------------|-----------------------------------------------------------------------------------------------------------------------------------------------------------------------------------------------------------------------------------------------------------------------------------------------------------------------------|-------------|----------------------------------------------------------------------------------------------------------------------------------------------------------------------------------------------------------------------------------------------------------------------------------------------------------------------------------------------|--------------|
| +<br>- | s11b | unpaired t-test | Methods Para 5 | 4,4,2,4                                                                  | individual areas  | Fig. legends | Mean +/- S.D.                      | Fig. Legend | (Top left) (E14.5) p=0.0454291 (E15.5) p=0.000191556<br>(Bottom left) (E12.5) p=0.00616318 (E13.5) p=0.00150946 (E14.5) p=0.0340521 (E15.5) p=0.000137855<br>(Top right) (E14.5) p=0.0476761 (E15.5) p=0.000108853<br>(Bottom right) (E12.5) p=0.0020694 (E13.5) p=2.858291e-006 (E14.5) p=0.00395868 (E15.5) p=0.000428593 | Fig. Legend | (top left) (E14.5) t=4.53034 df=2 E15.5 t=8.08736 df=6<br>(Bottom left) (E12.5) t=4.12765 df=6 (E13.5) t=5.50384 df=6 (E14.5) t=5.27972 df=2 (E15.5) t=8.57839 df=6<br>(Top right) (E14.5) t=4.41442 df=2 E15.5 t=8.94673 df=6<br>(Bottom right) (E12.5) t=5.17249 df=6 (E13.5) t=16.7826 df=6 (E14.5) t=15.8465 df=2 (E15.5) t=6.98454 df=6 | not included |
| +<br>- | s12b | N/A             | N/A            | 65, 70, 40                                                               | Dil+; PAX6+ cells | Fig. legends | none                               | N/A         | N/A                                                                                                                                                                                                                                                                                                                         | N/A         | N/A                                                                                                                                                                                                                                                                                                                                          |              |
| +<br>- | s13b | unpaired t-test | Methods Para 5 | 3,3                                                                      | brains            | Fig. legends | Mean +/- S.D.                      | Fig. Legend | (*) p=0.0118                                                                                                                                                                                                                                                                                                                | Fig. Legend | (*) t=4.388 df=4                                                                                                                                                                                                                                                                                                                             | not included |
| +<br>- | s13c | unpaired t-test | Methods Para 5 | 1,159 BrdU+ cells from 3 brains<br>1,492 BrdU+ cells from 3 brains       | cells from brains | Fig. legends | Mean +/- S.D. of individual brains | Fig. Legend | (n.s.) p=0.2188                                                                                                                                                                                                                                                                                                             | Fig. Legend | (n.s.) t=1.457 df=4                                                                                                                                                                                                                                                                                                                          | not included |
| +<br>- | s16b | unpaired t-test | Methods Para 5 | 224 cells from 3 brains<br>248 cells from 3 brains                       | cells from brains | Fig. legends | Mean +/- S.D. of individual brains | Fig. Legend | (n.s.) p=0.2643                                                                                                                                                                                                                                                                                                             | Fig. Legend | (n.s.) t=1.297 df=4                                                                                                                                                                                                                                                                                                                          | not included |
| +<br>- | s16d | N/A             | N/A            | 112, 61                                                                  | Mitotic cells     | Fig. legends | none                               | N/A         | N/A                                                                                                                                                                                                                                                                                                                         | N/A         | N/A                                                                                                                                                                                                                                                                                                                                          |              |
| +<br>- | s15b | unpaired t-test | Methods Para 5 | 238 BrdU+;EdU+ cells from 3 brains<br>262 BrdU+;EdU+ cells from 3 brains | cells from brains | Fig. legends | Mean +/- S.D. of individual brains | Fig. Legend | (**) p=0.00008250                                                                                                                                                                                                                                                                                                           | Fig. Legend | (**) t=16.32 df=4                                                                                                                                                                                                                                                                                                                            | not included |

|   |      |                 |                     |                                            |                   |              |                                    |             |                        |             |                        |              |
|---|------|-----------------|---------------------|--------------------------------------------|-------------------|--------------|------------------------------------|-------------|------------------------|-------------|------------------------|--------------|
| + | s15c | unpaired t-test | Methods Paragraph 5 | 199 BrdU +;EdU +;BLBP+ cells from 3 brains | cells from brains | Fig. legends | Mean +/- S.D. of individual brains | Fig. Legend | (**) both p=0.00002420 | Fig. Legend | (**) both t=22.25 df=4 | not included |
|---|------|-----------------|---------------------|--------------------------------------------|-------------------|--------------|------------------------------------|-------------|------------------------|-------------|------------------------|--------------|

## ► Representative figures

1. Are any representative images shown (including Western blots and immunohistochemistry/staining) in the paper?

If so, what figure(s)?

All images are representative and most are accompanied by quantitative analysis. The following figures contain only representative images:

Fig 1c-j, Fig 4a, Fig 5a

sFig 1, sFig 2, sFig 3a&h, sFig 4, sFig 6, sFig 7, sFig 13a, sFig 14, sFig 16b&c

2. For each representative image, is there a clear statement of how many times this experiment was successfully repeated and a discussion of any limitations in repeatability?

If so, where is this reported (section, paragraph #)?

No, but all were representative of more than 2-3 individual experiments.

## ► Statistics and general methods

1. Is there a justification of the sample size?

If so, how was it justified?

Where (section, paragraph #)?

Even if no sample size calculation was performed, authors should report why the sample size is adequate to measure their effect size.

Sample size is generally justified based on statistical analysis, and previous publications on similar topics (stated in Methods section).

2. Are statistical tests justified as appropriate for every figure?

Where (section, paragraph #)?

Yes, Methods.

- a. If there is a section summarizing the statistical methods in the methods, is the statistical test for each experiment clearly defined?

Yes, Methods Paragraph 5

- b. Do the data meet the assumptions of the specific statistical test you chose (e.g. normality for a parametric test)?

Where is this described (section, paragraph #)?

Yes, all meet criteria of  $p < 0.05$  in t-test.



- c. Is there any estimate of variance within each group of data?  
 Is the variance similar between groups that are being statistically compared?  
 Where is this described (section, paragraph #)?  
 Yes, all bar graphs are represented as mean +/- standard deviation, as described in Figure Legends and Methods.
- d. Are tests specified as one- or two-sided?  
 Two-sided, stated in Methods paragraph 5.
- e. Are there adjustments for multiple comparisons?  
 No
3. Are criteria for excluding data points reported?  
 Was this criterion established prior to data collection?  
 Where is this described (section, paragraph #)?  
 No data points were excluded as stated in Methods.
4. Define the method of randomization used to assign subjects (or samples) to the experimental groups and to collect and process data.  
 If no randomization was used, state so.  
 Where does this appear (section, paragraph #)?  
 No randomization was used as stated in Methods.
5. Is a statement of the extent to which investigator knew the group allocation during the experiment and in assessing outcome included?  
 If no blinding was done, state so.  
 Where (section, paragraph #)?  
 No blinding experiment was done, because all reported differences amongst groups were clear. This is stated in the methods section.
6. For experiments in live vertebrates, is a statement of compliance with ethical guidelines/regulations included?  
 Where (section, paragraph #)?  
 Yes, in Methods section, paragraph 1.
7. Is the species of the animals used reported?  
 Where (section, paragraph #)?  
 Yes, in Methods section, paragraph 1. Mice are used.
8. Is the strain of the animals (including background strains of KO/transgenic animals used) reported?  
 Where (section, paragraph #)?  
 Yes, in Methods section, paragraph 1.
9. Is the sex of the animals/subjects used reported?  
 Where (section, paragraph #)?  
 No.
10. Is the age of the animals/subjects reported?  
 Where (section, paragraph #)?  
 Yes, in Figures and Figure Legends for all figures.
11. For animals housed in a vivarium, is the light/dark cycle reported?  
 Where (section, paragraph #)?  
 No

12. For animals housed in a vivarium, is the housing group (i.e. number of animals per cage) reported? No
- Where (section, paragraph #)?
13. For behavioral experiments, is the time of day reported (e.g. light or dark cycle)? N/A
- Where (section, paragraph #)?
14. Is the previous history of the animals/subjects (e.g. prior drug administration, surgery, behavioral testing) reported? N/A
- Where (section, paragraph #)?
- a. If multiple behavioral tests were conducted in the same group of animals, is this reported? N/A
- Where (section, paragraph #)?
15. If any animals/subjects were excluded from analysis, is this reported? No animals were excluded, as stated in the Methods section.
- Where (section, paragraph #)?
- a. How were the criteria for exclusion defined?
- Where is this described (section, paragraph #)?
- b. Specify reasons for any discrepancy between the number of animals at the beginning and end of the study.
- Where is this described (section, paragraph #)?

## ▶ Reagents

1. Have antibodies been validated for use in the system under study (assay and species)? Yes, by the previous publications and the vendors. Specific non-commercial antibodies are referred in Methods section.
- a. Is antibody catalog number given? Yes, along with the dilution factor used: in the Methods section, paragraph 3.
- Where does this appear (section, paragraph #)?
- b. Where were the validation data reported (citation, supplementary information, Antibodypedia)? Specific non-commercial antibodies are cited in Methods section, paragraph 3.
- Where does this appear (section, paragraph #)?
2. If cell lines were used to reflect the properties of a particular tissue or disease state, is their source identified? N/A
- Where (section, paragraph #)?

a. Were they recently authenticated?

Where is this information reported (section, paragraph #)?

## ▶ Data deposition

Data deposition in a public repository is mandatory for:

- a. Protein, DNA and RNA sequences
- b. Macromolecular structures
- c. Crystallographic data for small molecules
- d. Microarray data

Deposition is strongly recommended for many other datasets for which structured public repositories exist; more details on our data policy are available [here](#). We encourage the provision of other source data in supplementary information or in unstructured repositories such as [Figshare](#) and [Dryad](#).

1. Are accession codes for deposit dates provided?

Where (section, paragraph #)?

N/A

## ▶ Computer code/software

Any custom algorithm/software that is central to the methods must be supplied by the authors in a usable and readable form for readers at the time of publication. However, referees may ask for this information at any time during the review process.

1. Identify all custom software or scripts that were required to conduct the study and where in the procedures each was used.

N/A

2. Is computer source code/software provided with the paper or deposited in a public repository? Indicate in what form this is provided or how it can be obtained.

N/A

## ▶ Human subjects

1. Which IRB approved the protocol?

Where is this stated (section, paragraph #)?

N/A

2. Is demographic information on all subjects provided?

Where (section, paragraph #)?

N/A

3. Is the number of human subjects, their age and sex clearly defined?

Where (section, paragraph #)?

N/A

4. Are the inclusion and exclusion criteria (if any) clearly specified?

Where (section, paragraph #)?

N/A

5. How well were the groups matched?   
Where is this information described (section, paragraph #)?
6. Is a statement included confirming that informed consent was obtained from all subjects?   
Where (section, paragraph #)?
7. For publication of patient photos, is a statement included confirming that consent to publish was obtained?   
Where (section, paragraph #)?

## ► fMRI studies

For papers reporting functional imaging (fMRI) results please ensure that these minimal reporting guidelines are met and that all this information is clearly provided in the methods:

1. Were any subjects scanned but then rejected for the analysis after the data was collected?   
a. If yes, is the number rejected and reasons for rejection described?   
Where (section, paragraph #)?
2. Is the number of blocks, trials or experimental units per session and/or subjects specified?   
Where (section, paragraph #)?
3. Is the length of each trial and interval between trials specified?
4. Is a blocked, event-related, or mixed design being used? If applicable, please specify the block length or how the event-related or mixed design was optimized.
5. Is the task design clearly described?   
Where (section, paragraph #)?
6. How was behavioral performance measured?
7. Is an ANOVA or factorial design being used?
8. For data acquisition, is a whole brain scan used?   
If not, state area of acquisition.  
a. How was this region determined?

9. Is the field strength (in Tesla) of the MRI system stated?
- a. Is the pulse sequence type (gradient/spin echo, EPI/spiral) stated?
- b. Are the field-of-view, matrix size, slice thickness, and TE/TR/flip angle clearly stated?
10. Are the software and specific parameters (model/functions, smoothing kernel size if applicable, etc.) used for data processing and pre-processing clearly stated?
11. Is the coordinate space for the anatomical/functional imaging data clearly defined as subject/native space or standardized stereotaxic space, e.g., original Talairach, MNI305, ICBM152, etc? Where (section, paragraph #)?
12. If there was data normalization/standardization to a specific space template, are the type of transformation (linear vs. nonlinear) used and image types being transformed clearly described? Where (section, paragraph #)?
13. How were anatomical locations determined, e.g., via an automated labeling algorithm (AAL), standardized coordinate database (Talairach daemon), probabilistic atlases, etc.?
14. Were any additional regressors (behavioral covariates, motion etc) used?
15. Is the contrast construction clearly defined?
16. Is a mixed/random effects or fixed inference used?
- a. If fixed effects inference used, is this justified?
17. Were repeated measures used (multiple measurements per subject)?
- a. If so, are the method to account for within subject correlation and the assumptions made about variance clearly stated?
18. If the threshold used for inference and visualization in figures varies, is this clearly stated?
19. Are statistical inferences corrected for multiple comparisons?
- a. If not, is this labeled as uncorrected?

20. Are the results based on an ROI (region of interest) analysis?

N/A

a. If so, is the rationale clearly described?

b. How were the ROI's defined (functional vs anatomical localization)?

21. Is there correction for multiple comparisons within each voxel?

N/A

22. For cluster-wise significance, is the cluster-defining threshold and the corrected significance level defined?

N/A

## ► Additional comments

---

Additional Comments
